# Supplementary material for: Three-dimensional NiAl-mixed metal oxide film: preparation and capacitive deionization performances
Source: Royal Society of Chemistry journal article supplement (doi:10.1039/c4ra08415b), 2014-01-01
Supplement: c4ra08415b1.pdf [file c4ra08415b1.pdf]

Electronic Supplementary Information (ESI) for

**Three-Dimensional NiAl-mixed Metal Oxide Film:  
Preparation and Capacitive Deionization Performances**

Xiaodong Lei,\* Bo Wang, Junfeng Liu, Zhengping Ye, Zheng Chang, Meihong Jiang and  
Xiaoming Sun

*State Key Laboratory of Chemical Resource Engineering, Beijing University of Chemical Technology, PO Box 98, Beijing  
100029, China. Tel.: +86-10-64455357; Fax: +86-10-64425385; E-mail address: leixd@mail.buct.edu.cn (X. Lei).*

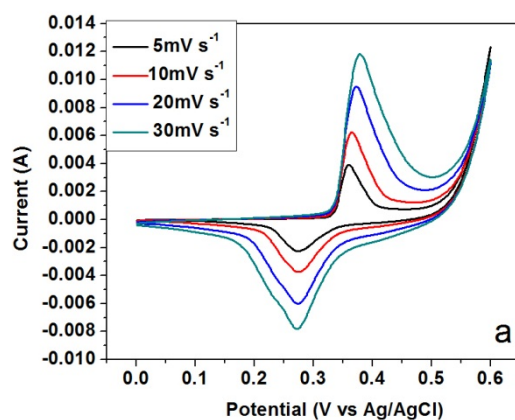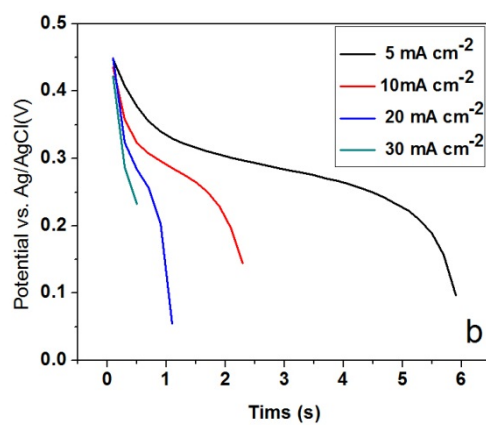

**Fig. S1** Electrochemical characterizations of nickel foam. (a) CV curves at different scan rates (5 – 30 mV s<sup>-1</sup>); (b) galvanostatic discharge curves at various discharge current densities (5 – 30 mA cm<sup>-2</sup>).

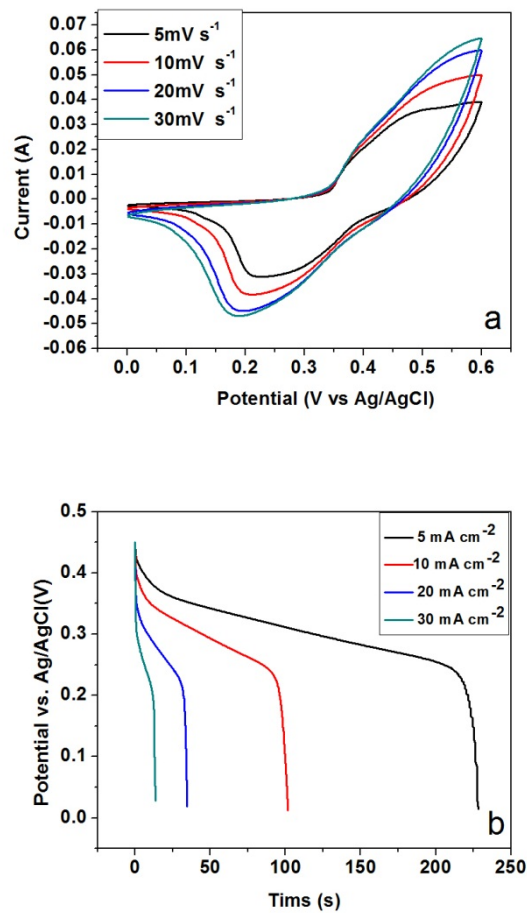

**Fig. S2** Electrochemical characterizations of NiAl-LDH film on nickel foam. (a) CV curves at different scan rates (5 – 30 mV s<sup>-1</sup>); (b) galvanostatic discharge curves at various discharge current densities (5 – 30 mA cm<sup>-2</sup>).

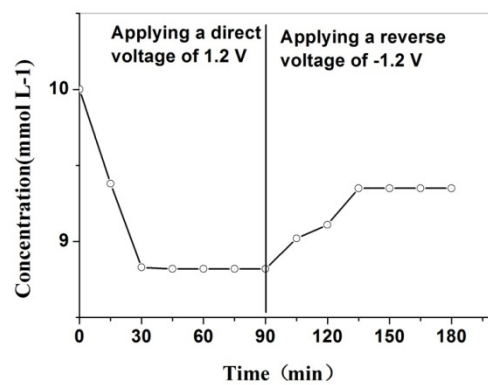

**Fig. S3** Electrosorption and desorption equilibrium curve of NiAl-LDH electrode in 0.01 mol L<sup>-1</sup> NaCl solution.
